# Supplementary material for: Naturally produced type I IFNs enhance human myeloid dendritic cell maturation and IL-12p70 production and mediate elevated effector functions in innate and adaptive immune cells
Source: Cancer Immunol Immunother. 2018 Jul 13;67(9):1425–36. doi: 10.1007/s00262-018-2204-2 (PMC6132867; doi:10.1007/s00262-018-2204-2)
Supplement: Supplementary file 1 — Supplementary material 1 (PDF 321 KB) [file 262_2018_2204_MOESM1_ESM.pdf]

**Supplementary Figure 1**

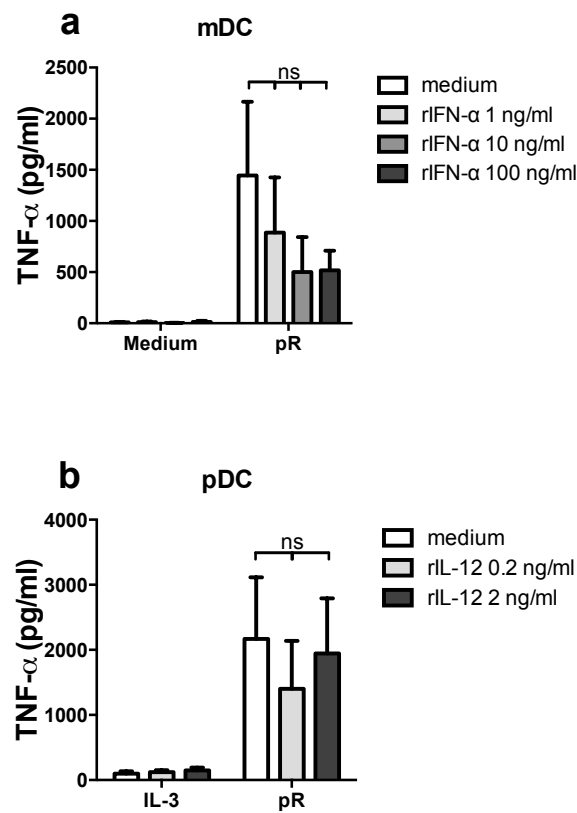

Purified mDCs and pDCs were stimulated overnight with medium alone/IL-3 or pR complexes in the presence or absence of increasing concentration recombinant IFN- $\alpha$  or IL-12p70, respectively. TNF- $\alpha$  release into supernatant was analyzed with ELISA. **(a)** Average secreted levels of TNF- $\alpha$   $\pm$  SEM from 9 mDC donors in the presence or absence of increasing levels (1; 10; and 100 ng/ml) of rIFN- $\alpha$ . and **(b)** Average secreted levels of TNF- $\alpha$   $\pm$  SEM from 6 pDC donors in the presence or absence of increasing levels (200 and 2000 pg/ml) of rIL-12p70. Statistical differences compared to untreated medium/IL-3 or pR-activated controls were analyzed by paired one-way ANOVA with Bonferroni's multiple comparison test.

Supplementary Figure 2

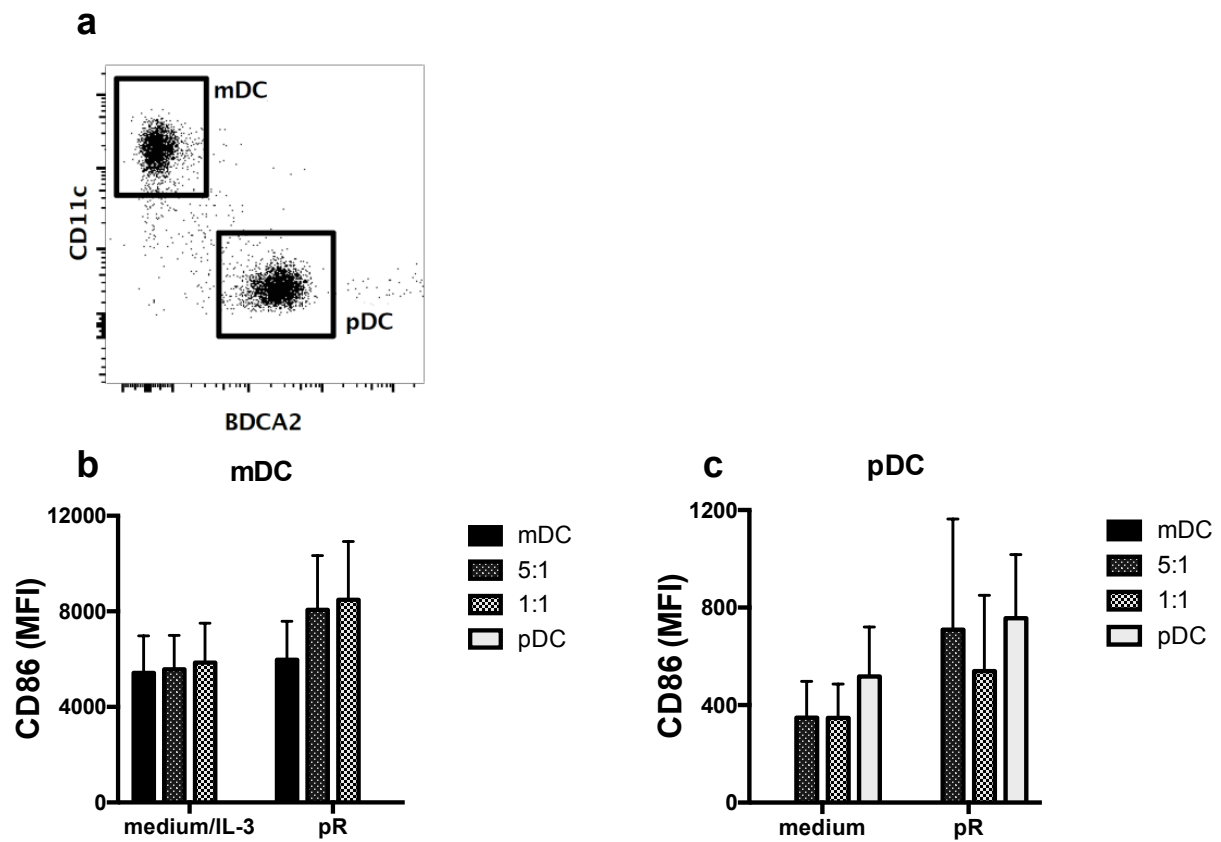

Purified autologous mDCs and pDCs were cultured overnight either alone or together in a 5:1 or 1:1 ratio in the presence of medium alone/IL-3 or pR complexes. The total number of cells was kept constant between the cultures. Upregulation of maturation marker CD86 was evaluated by flow cytometry. (a) Representative figure of gating strategy for identification of CD11c<sup>+</sup> mDCs and BDCA2<sup>+</sup> pDCs. Average MFI expression levels of CD86  $\pm$  SEM on (b) mDCs or (c) pDCs from 5 donors cultured either alone or combined at a 5:1 or 1:1 ratio in the presence or absence of stimuli.

### Supplementary Figure 3

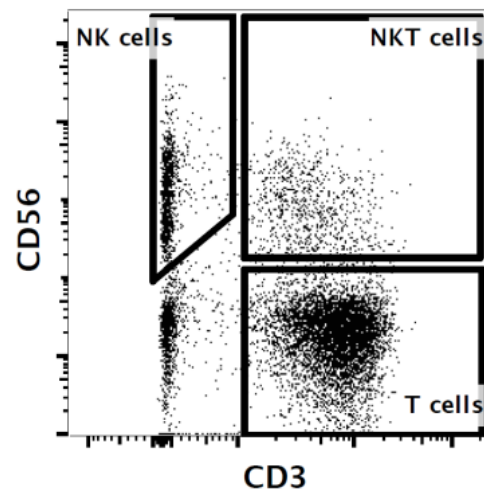

Representative figure of gating strategy for identification of CD56<sup>+</sup>CD3<sup>-</sup> NK cells, CD56<sup>+</sup>CD3<sup>+</sup> NKT cells, and CD56<sup>-</sup>CD3<sup>+</sup> T cells in co-cultures of activated DCs and allogenic PBLs

Supplementary Figure 4

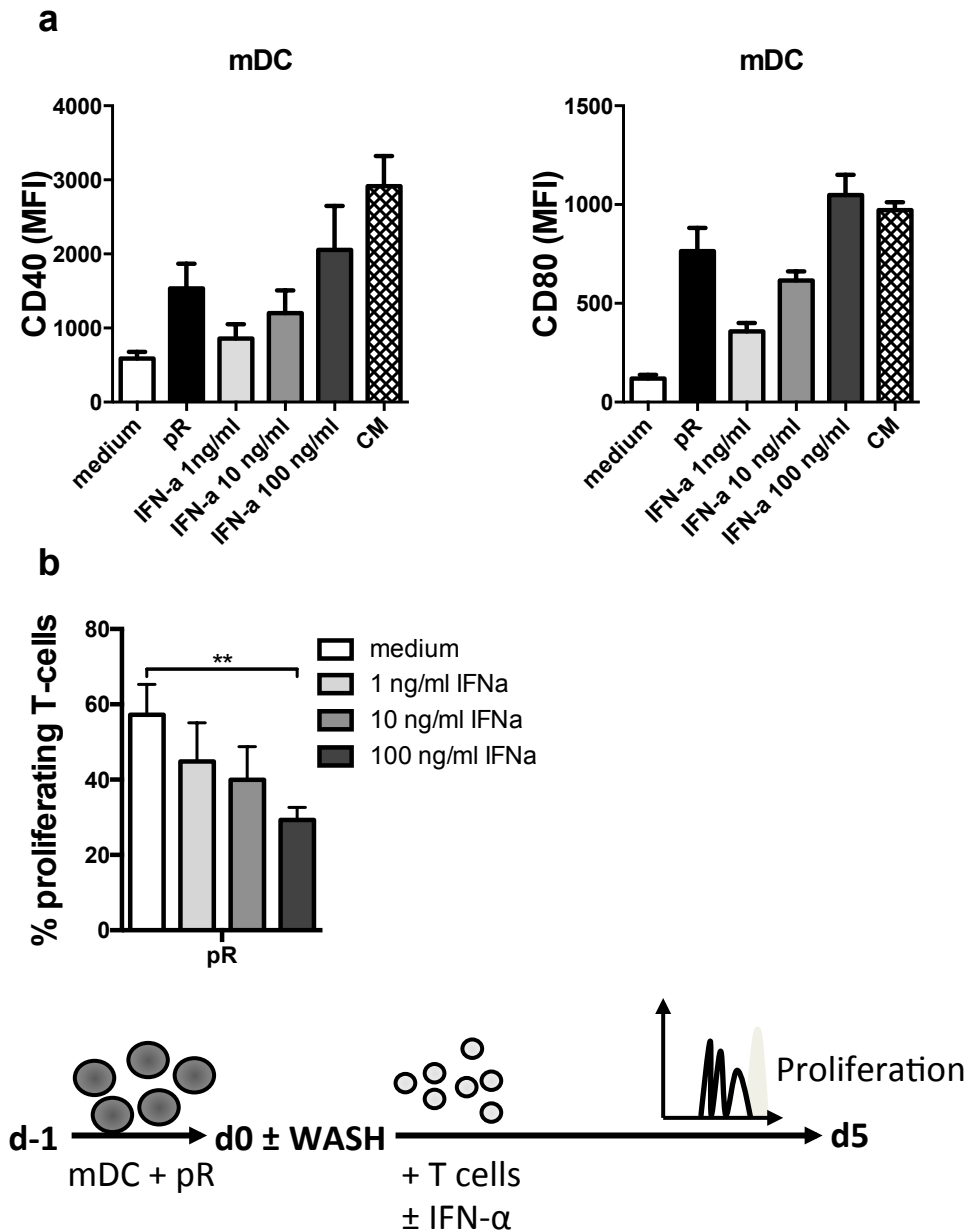

(a) Purified mDCs were activated overnight with medium alone, pR complexes, increasing levels (1; 10; and 100 ng/ml) rIFN- $\alpha$ , or pR-CM. The mean expression  $\pm$  SEM of CD40 and CD80 was investigated with flow cytometry. (b) Purified mDCs were activated overnight with pR complexes. Mean percentage  $\pm$  SEM proliferating T cells induced by 6 DC donors that were washed 3 times before addition of T cells and increasing levels (1; 10; and 100 ng/ml) of rIFN- $\alpha$ . Statistical differences were analyzed by paired one-way ANOVA with Bonferroni's multiple comparison test and significance is indicated by \*\* ( $p < 0.05$ ). (c) Illustrative picture of (b).
